# Supplementary material for: Exosome-Mediated Activation of Neuronal Cells Triggered by γ-Aminobutyric Acid (GABA)
Source: MDPI journal article supplement (doi:10.3390/nu13082544), 2021-07-25
Supplement: s1 [file s1]

Table S1 Target genes of four miRNA

|         |          |          |          |              |         |
|---------|----------|----------|----------|--------------|---------|
| CSMD2   | CYB5RL   | LPA      | CASC5    | NR2E3        | CD70    |
| CLEC12B | IL24     | TRAPPC3  | PARP11   | ENO4         | LAIR1   |
| PITPNC1 | PRSS22   | BIRC7    | RELL1    | GLP2R        | LRRC7   |
| IL21R   | SLC22A23 | CHRD1    | INPP4B   | FFAR4        | WDR64   |
| SOST    | C6orf132 | RIT1     | KIR2DL4  | EXOC5        | ZNF829  |
| ENPP1   | GRIPAP1  | CTAG2    | PLD5     | 10-Mar       | ZNF471  |
| SCN2B   | SPG7     | CXCL16   | DOCK9    | PRY2         | PI16    |
| SOX7    | SPTB     | IL6R     | PLEKHA5  | DIS3L2       | TNN     |
| MAMLD1  | CASP10   | SEMA3A   | DCBLD1   | HLA-DOB      | KAT6B   |
| PLA2G6  | NPAS3    | HTRA4    | GRHL3    | HTR1F        | CCDC64  |
| NFIA    | LEP      | SLC5A7   | ASPG     | UNKL         | SLC12A3 |
| SMPDL3B | CASC4    | FAM26E   | SCNN1D   | IL12RB2      | EPST11  |
| CIT     | NFAM1    | C6orf15  | CCDC126  | PCDHA1       | SLC45A2 |
| ZNF589  | GSG1     | GCSAM    | IGSF23   | ACSL6        | NEK6    |
| SGPP2   | IRF2     | NRIP1    | SETBP1   | TVP23C-CDRT4 | CDH23   |
| FAM196A | EPB41    | SLC23A3  | KIF18B   | AVP          | SLC24A1 |
| BRD3    | SCN5A    | RNF212   | RHBDL2   | ZNF431       | KLHDC7B |
| PDXK    | SHANK2   | EVPL1    | EPM2A    | ZBTB21       | SP140   |
| SLC6A17 | RHBDD1   | CXCL1    | KCNK13   | MSL3         | RDX     |
| HAPLN4  | NME9     | KCNN2    | FRAS1    | FEM1A        | DOK7    |
| AKAP4   | SH3RF3   | KLHL30   | ECEL1    | HS6ST3       | DCTN5   |
| MPPED2  | PKD1     | PCSK6    | KRT6A    | RETNLB       | PCDHA5  |
| ATP2A1  | CLCN6    | SHC4     | PCDHA8   | TRPM3        | RUFY2   |
| OSR1    | C11orf86 | ABHD13   | ZNF320   | SYDE2        | FAM206A |
| TMCC2   | NEUROG1  | SPRR2E   | CELF3    | PDE1C        | P4HA3   |
| PEX2    | NXPH3    | LDB3     | C22orf24 | PRRG2        | MTCP1   |
| AFF1    | SIGLEC10 | CPXM2    | ARHGAP40 | DEPTOR       | CKLF    |
| CCL19   | HVCN1    | NPY2R    | HRH2     | EIF4E2       | LDLRAD2 |
| ACER2   | SHC3     | DOPEY1   | TET3     | LRCOL1       | NBPF6   |
| FIBCD1  | DUSP16   | ZSCAN1   | CDKN2B   | ZDHHC23      | NEDD9   |
| PRDM11  | FGD5     | KRTAP4-1 | SLC9A4   | CCDC144A     |         |
